# Supplementary material
Source: publisher figshare collection journal article supplement (https://frontiersin.figshare.com/ndownloader/files/25410083)
Supplement: Supplementary file [file 25410083]

## Supplementary Material

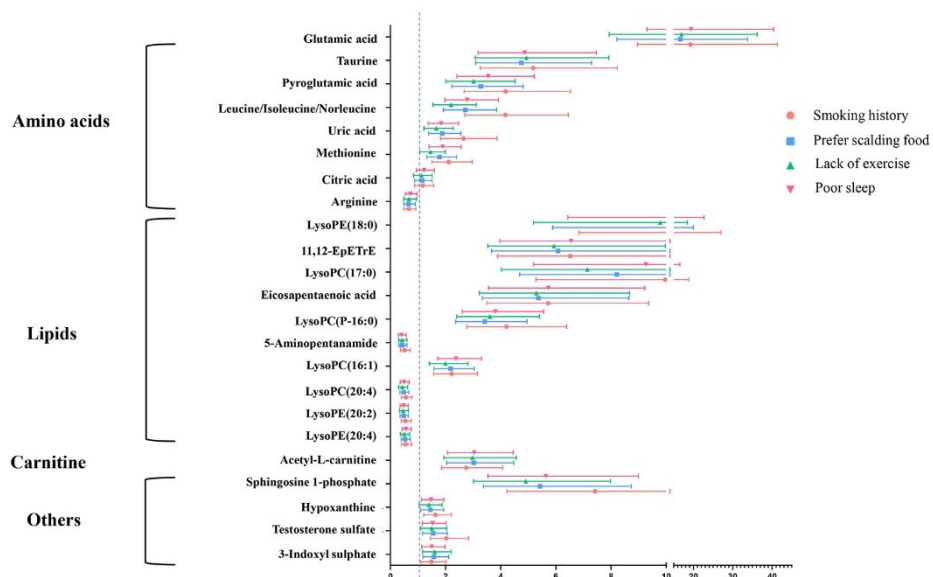

Supplementary Figure S1 ORs per SD increment (95% CI) of each metabolite based on results from multivariate-adjusted conditional logistic regression models.

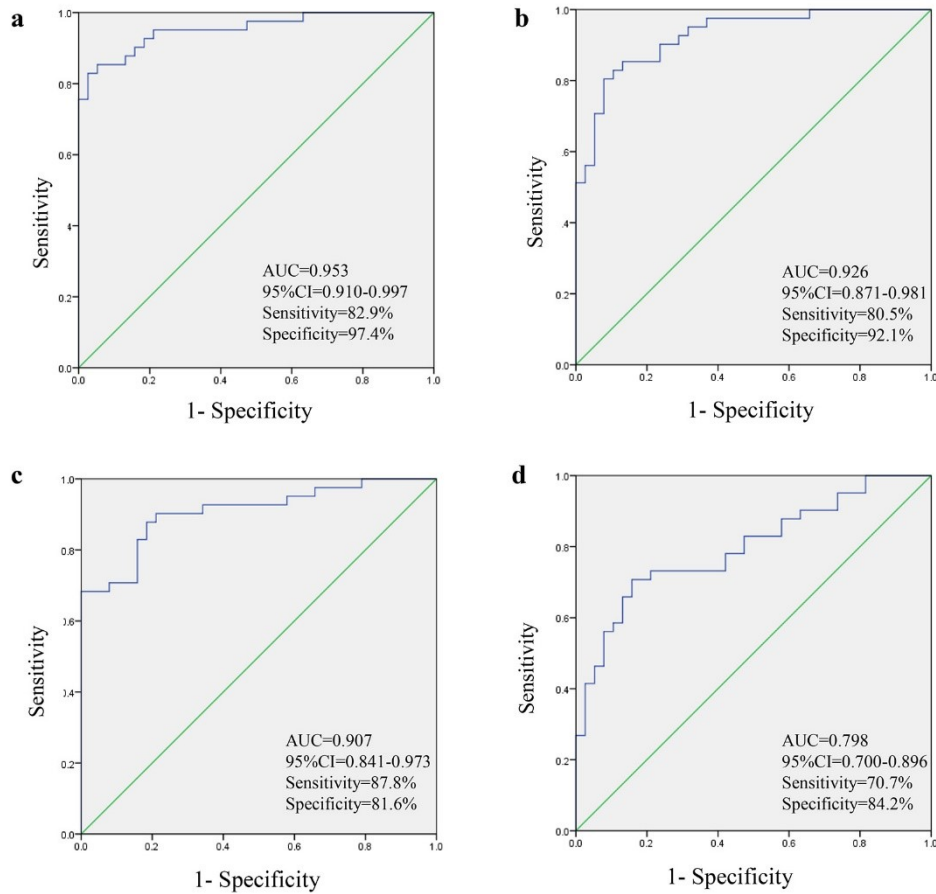

Supplementary Figure S2 The ROC curve with AUC, CI, sensitivity, specificity of (a) Diagnosis panel in training set, (b) Glutamic acid, (c) LysoPE(18:0) and (d) Taurine, respectively. AUC: Area under curve; CI: Confidence interval.

$m/z$  128.04       $m/z$  146.05       $m/z$  102.06       $m/z$  85.03

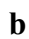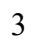

QC-N-400-1200 #1803 RT: 9.59 AV: 1 NL: 1.16E5  
 F: FTMS - p ESI d Full ms2 480.3090@hcd40.00 [50.0000-510.0000]

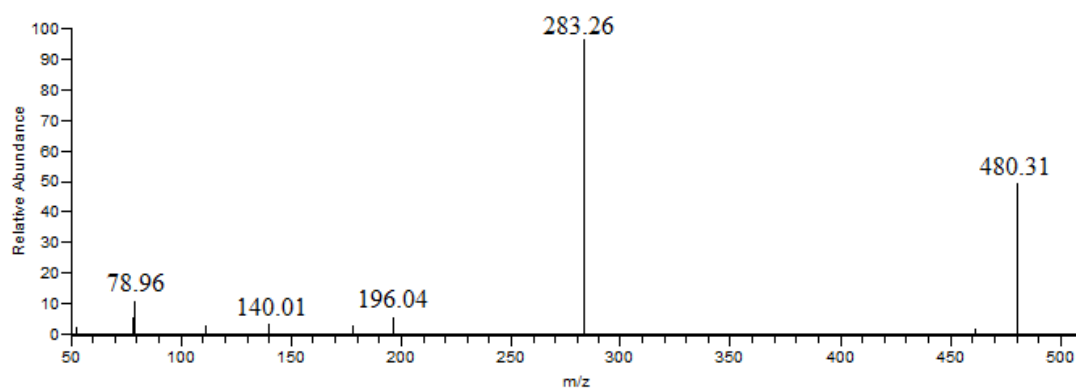

c

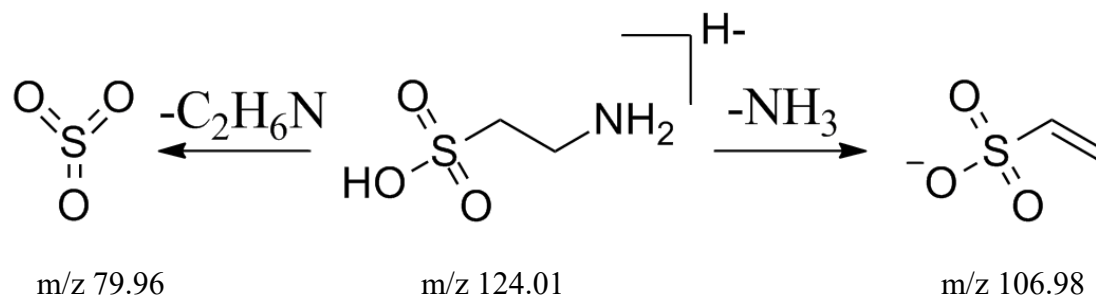

QC-N-80-180 #321 RT: 1.03 AV: 1 NL: 5.11E5  
 F: FTMS - p ESI d Full ms2 124.0070@hcd40.00 [50.0000-145.0000]

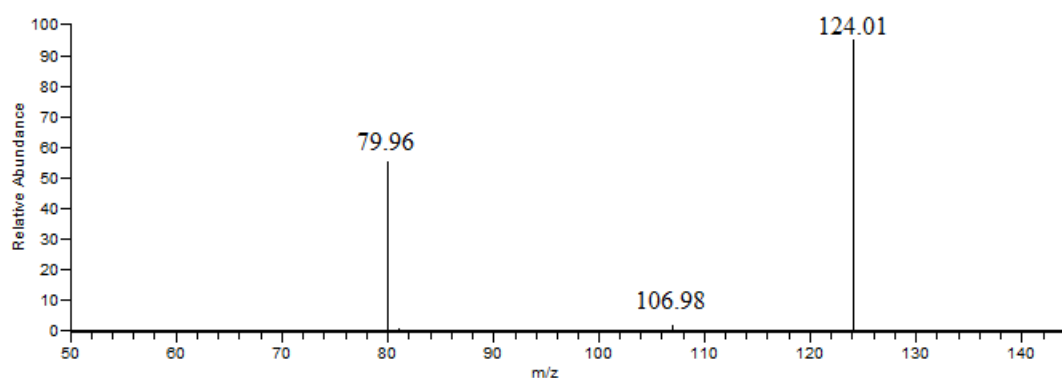

Supplementary Figure S3 The structures of three metabolic biomarkers and the mass fragmentation pathways. (a) Glutamic acid ( $\text{C}_5\text{H}_9\text{NO}_4$ ) was observed under negative mode ( $m/z$  146.05), and the fragment ions were 128.04 [ $\text{M}-\text{H}-\text{H}_2\text{O}$ ] $^-$ , 102.06 [ $\text{M}-\text{H}-\text{CO}_2$ ] $^-$  and 85.03 [ $\text{M}-\text{H}-\text{CO}_2-\text{NH}_3$ ] $^-$ ; (b) LysoPE(18:0) ( $\text{C}_{23}\text{H}_{48}\text{NO}_7\text{P}$ ) was observed under negative mode ( $m/z$  480.31), and the fragment ions were 283.26 [ $\text{M}-\text{H}-\text{C}_5\text{H}_{12}\text{O}_5\text{NP}$ ] $^-$ , 196.04 [ $\text{M}-\text{H}-\text{C}_{18}\text{H}_{36}\text{O}_2$ ] $^-$ , 140.01 [ $\text{M}-\text{H}-\text{C}_{18}\text{H}_{36}\text{O}_2-\text{C}_3\text{H}_4\text{O}$ ] $^-$ , 78.96 [ $\text{M}-\text{H}-\text{C}_{18}\text{H}_{36}\text{O}_2-\text{C}_3\text{H}_4\text{O}-\text{C}_2\text{H}_7\text{ON}$ ] $^-$ ; (c) Taurine ( $\text{C}_2\text{H}_7\text{NO}_3\text{S}$ ) was observed under negative mode ( $m/z$  124.01), and the fragment ions were 106.98 [ $\text{M}-\text{H}-\text{NH}_3$ ] $^-$ , 79.96 [ $\text{M}-\text{H}-\text{C}_2\text{H}_6\text{N}$ ] $^-$ .
